# Supplementary material
Source: Research Square preprint supplement (doi:10.21203/rs.3.rs-7877620/v1)
Supplement: Supplementary file 1 [file 3dd9d11c8f44afd587af9d53.docx]

**Supplementary Information for：**

**Organizational Inertia and Teacher Burnout in High-Performance Schools: A Cross-Level Analysis of the Pressure Sinking Mechanism**

**Contens**

[Part 1: Complete Coding Structure and Process 1](#_Toc27206)

[Supplementary Table S1: Overview of Coding Distribution 1](#_Toc7359)

[Supplementary Table S2: Coding Structure for Theoretical Dimension 1 1](#_Toc4717)

[Supplementary Table S3: Coding Structure for Theoretical Dimension 2 4](#_Toc17158)

[Supplementary Table S4: Coding Structure for Theoretical Dimension 3 6](#_Toc4480)

[Supplementary Table S5: Coding Saturation Process 10](#_Toc1459)

[Supplementary Table S6: Inter-coder Reliability Test 10](#_Toc18666)

[Part 2: Representative Data Excerpts 11](#_Toc9155)

[Supplementary Note S1: Nine Key Data Passages 11](#_Toc23019)

[Passage 1: Sanctification of Historical Achievements 11](#_Toc1739)

[Passage 2: The Typical Scenario of Decoupling Authority and Responsibility 12](#_Toc26576)

[Passage 3: Quantitative Evidence of Resource Depletion 13](#_Toc19655)

[Passage 4: Suppression of Professional Judgement and Decline in Efficacy 14](#_Toc2301)

[Passage 5: The Impact of New Gaokao Reform and the Paradox of Control 15](#_Toc18810)

[Passage 6: Individualization of Problem Attribution 16](#_Toc17748)

[Passage 7: Moralization of Work Requirements 17](#_Toc962)

[Passage 8: Systemic Reflection and the “Waterloo-style” Turning Point 18](#_Toc13497)

[Part 3: Details of Research Methodology 21](#_Toc5764)

[Supplementary Method S1: Interview Protocol and Sampling Strategy 21](#_Toc9919)

[II. Semi-structured Interview Guide 21](#_Toc23082)

[III.Data Collection Process 22](#_Toc17608)

[IV. Quality Assurance Measures 23](#_Toc8894)

**Part 1: Complete Coding Structure and Process**

This section presents the complete coding process of the research. Following Charmaz's (2014) constructivist grounded theory approach, we developed 73 initial codes from 32 interview transcripts, integrated them into 13 focused categories, and ultimately constructed three theoretical dimensions. The coding process proceeded through iterative stages, with each stage building upon insights from the previous level whilst maintaining continuous dialogue with empirical data.

**Supplementary Table S1: Overview of Coding Distribution**

| **Theoretical Dimension** | **Focused Categories** | **Initial Codes** | **Total Citations*** | **Average Citations per Code** |
| --- | --- | --- | --- | --- |
| Dimension 1: Ossification of Success Experience and Response to Environmental Change | 5 | 25 | 117 | 4.68 |
| Dimension 2: Transfer of Organisational Responsibility to Individuals | 4 | 21 | 94 | 4.48 |
| Dimension 3: Multi-dimensional Dilemmas in Teacher Working Conditions | 5 | 30 | 138 | 4.60 |
| Total | 14 | 73 | 349 | 4.59 |

**Note**: Citations refer to the number of occurrences of each code in interview transcripts. The relatively consistent average citation frequencies across the three dimensions (4.48-4.68) indicate balanced theoretical saturation at organisational, transmission mechanism, and individual levels.

**Supplementary Table S2: Coding Structure for Theoretical Dimension 1**

Table S2 presents the complete coding structure for the theoretical dimension “Ossification of Success Experience and Response to Environmental Change”. This dimension comprises 5 focused categories and 25 initial codes, with a total of 117 citations.

Coding Structure for Focused Category 1.1

| **Initial Code** | **Frequency** | **Representative Data Sources** | **Theoretical Significance** |
| --- | --- | --- | --- |
| 1.Historical narrative of extreme working hours | 8 | SCH-03, TEA-01, TEA-02 | Attributing success to extreme dedication |
| 2.Glorified memory of golden era | 12 | SCH-01, SCH-03, ADM-01, PAR-01, PAR-02 | Establishing historical reference standards |
| 3.Institutionalisation of diligent teaching and arduous learning ideology | 15 | SCH-03, SCH-04, Multiple Teachers and Administrators | Ossification of core cultural ideology |
| 4.Frequent reception of visiting schools | 5 | SCH-03 | External recognition reinforcing identity |
| 5.Historical peak of Tsinghua/Peking University admissions | 7 | SCH-01, SCH-02, ADM-01, PAR-01, PAR-02 | Quantified memory of concrete achievements |
| 6.External evaluation as “teachers in hell” | 3 | SCH-03 | Extraordinarisation of success model |

**Note:** These six codes reveal how historical achievements were sacralised through selective organisational memory. The “teachers in hell” metaphor transformed extreme work conditions from specific historical contingencies into an eternal truth for achieving success.

Coding Structure for Focused Category 1.2

| **Initial Code** | **Frequency** | **Representative Data Sources** | **Theoretical Significance** |
| --- | --- | --- | --- |
| 7.Parental disappointment with top students | 6 | PAR-01，PAR-02，PAR-03 | Concretisation of external expectations |
| 8.Comparative expressions referencing historical glory | 9 | PAR-01, PAR-02, SCH-01, SCH-03 | Devaluation of current performance |
| 9.Anxiety over declining provincial rankings | 4 | ADM-02，SCH-01 | Concern over relative status |
| 10.Social expectations for Tsinghua/Peking University admissions | 8 | PAR-01, PAR-02, Parent Group Interviews | Rigid demands for top-tier performance |
| 11.Concerns over loss of regional educational centre status | 5 | SCH-01, SCH-02, SCH-03, School Management Group Interviews | Pressure to maintain monopoly position |

**Note:** Excellence identity becomes an “institutional burden” for the school. Parental expectations, social reputation, and historical status create triple pressures, compelling the school to sustain “peak” performance continuously.

Coding Structure for Focused Category 1.3

| **Initial Code** | **Frequency** | **Representative Data Sources** | **Theoretical Significance** |
| --- | --- | --- | --- |
| 12.Loss of liberal arts advantage | 7 | TEA-04, SCH-03 | Erosion of core competitiveness |
| 13.Impact of unified arts-sciences examination papers | 6 | TEA-04, Teacher Group Interviews | Fundamental change in assessment system |
| 14.Difficulties adapting to NewGaokao model | 5 | SCH-02, Teacher Group Interviews | Challenge of pedagogical reorganisation |
| 15.Teaching progress lagging four months behind | 3 | SCH-01 | Delayed response measures |
| 16.Inadequate preparation for “Strong Foundation Programme” | 4 | Teacher Group Interviews | Absence of elite cultivation system |

**Note:** The New Gaokao Reform constituted the core environmental shock, eliminating the school’s traditional liberal arts advantage and demanding entirely new pedagogical organisation, yet the school's response was markedly delayed.

Coding Structure for Focused Category 1.4

| **Initial Code** | **Frequency** | **Representative Data Sources** | **Theoretical Significance** |
| --- | --- | --- | --- |
| 17.Cessation of mathematics and physics competitions | 8 | SCH-02, Teacher Group Interviews | Interruption of elite cultivation pathway |
| 18.Nostalgic memories of historical competition achievements | 4 | SCH-01, Teacher Group Interviews | Lost domain of advantage |
| 19.Questioning of resource investment approaches | 3 | Teacher Group Interviews | Hesitation in strategic adjustment |
| 20.Absence of “Strong Foundation” cultivation system | 5 | SCH-02 | Delayed construction of new pathways |

**Note:** The rupture of subject competition systems reflects rigidified policy implementation. The school strictly enforced compulsory education equity policies, whilst other regions continued competition activities under alternative names, placing the school at a disadvantage in cultivating outstanding students.

Coding Structure for Focused Category 1.5

| **Initial Code** | **Frequency** | **Representative Data Sources** | **Theoretical Significance** |
| --- | --- | --- | --- |
| 21.Facial recognition surveillance systems | 4 | ADM-04, SCH-05 | Comprehensivisation of technological monitoring |
| 22.Comprehensive classroom surveillance coverage | 3 | TEA-07, Teacher Group Interviews | Visualised management |
| 23.Facial recognition attendance recording workload | 5 | TEA-07, SCH-05 | Refinement of quantified assessment |
| 24.Refined control of student time | 9 | TEA-04, Teacher Group Interviews | Rigidification of time allocation |
| 25.Timed assignment completion system | 6 | TEA-04, Student Group Interviews | Standardisation of learning processes |

Note: Facing environmental challenges, the school adopted “intensified control” rather than “adaptive adjustment”. The introduction of technological surveillance systems reflects the organisation’s shift from internal professional commitment constraints to external technological monitoring.

**Supplementary Table S3: Coding Structure for Theoretical Dimension 2**

This dimension comprises 4 focused categories and 21 initial codes, with a total of 94 citations. It reveals how organisations systematically transfer adaptation responsibilities to individuals through institutional arrangements and discursive strategies when refusing structural adjustments.

Coding Structure for Focused Category 2.1

| **Initial Code** | **Frequency** | **Representative Data Sources** | **Theoretical Significance** |
| --- | --- | --- | --- |
| 26.Attributing performance fluctuations to student “conscientiousness” | 4 | SCH-01 | Individual attribution bias |
| 27.Emphasis on declining student quality | 7 | School Management Group Interviews | External attribution shifting to individual attribution |
| 28.Criticism of student learning attitudes | 5 | Teacher Group Interviews | Moralisation of problem definition |
| 29.Neglect of teaching research system deficiencies | 4 | TEA-08, Teacher Group Interviews | Obscuring of systemic factors |

**Note:** When facing performance decline, management systematically attributes problems to the individual level (students not being conscientious enough, declining student quality) whilst evading organisational-level structural issues (teaching research system deficiencies, inadequate teacher cultivation).

Coding Structure for Focused Category 2.2

| **Initial Code** | **Frequency** | **Representative Data Sources** | **Theoretical Significance** |
| --- | --- | --- | --- |
| 30.Sudden personnel transfers | 6 | SCH-01, SCH-04 | Upward concentration of decision-making authority |
| 31.Frequent teacher turnover issues | 8 | STU-02, Teacher Group Interviews | Passive adaptation of implementation level |
| 32.Direct intervention by education bureau | 5 | SCH-04, SCH-05, School Management Group Interviews | Absence of autonomy |
| 33.School’s lack of autonomy | 4 | SCH-04, SCH-05, School Management Group Interviews | Asymmetry of authority and responsibility |
| 34.Disconnect between reform design and implementation | 7 | TEA-06, Teacher Group Interviews | Problems in top-level design |
| 35.Absence of systematic development planning | 5 | TEA-06, Teacher Group Interviews | Absence at strategic level |

Note: Authority-responsibility separation is the core mechanism of pressure sinking. Decision-making authority resides with the education bureau, implementation responsibility with the school, and adaptation costs are borne by teachers and students. This structural separation renders the school unable to control changes yet compelled to bear the consequences of change.

Coding Structure for Focused Category 2.3

| **Initial Code** | **Frequency** | **Representative Data Sources** | **Theoretical Significance** |
| --- | --- | --- | --- |
| 36. Issues with new teacher recruitment quality | 9 | ADM-03, School Management Group Interviews | Quality dilemma at entry point |
| 37.Mentor-mentee pairing becoming formalistic | 4 | SCH-01, School Management Group Interviews | Failure of cultivation mechanisms |
| 38.New teachers’ adaptation difficulties | 6 | TEA-01, Teacher Group Interviews | Absence of support systems |
| 39.Lack of support for teacher professional development | 5 | Teacher Group Interviews | Insufficient organisational investment |
| 40.Large-scale replacement of young teachers | 7 | SCH-01, School Management Group Interviews | Individuals bearing costs of failure |

**Note:** Teacher professional development is treated as individual responsibility rather than organisational obligation. New teachers are rapidly eliminated for being “unqualified”, yet the organisation lacks reflection on why it cannot cultivate qualified teachers.

Coding Structure for Focused Category 2.4

| **Initial Code** | **Frequency** | **Representative Data Sources** | **Theoretical Significance** |
| --- | --- | --- | --- |
| 41.Linking economic benefits to attendance | 5 | TEA-04, SCH-03 | Economic control mechanisms |
| 42.Institutional requirement to attend even when ill | 4 | TEA-04 | Rigidification of extreme demands |
| 43.Moral stigmatisation of resignation | 3 | TEA-04 | Moral constraints on mobility |
| 44.Institutionalised demands for dedication spirit | 8 | SCH-03, Teacher Group Interviews | Legitimation of moral discourse |
| 45.Extremely early arrival time requirements | 6 | SCH-03, Teacher Group Interviews | Extremisation of time demands |

Note: Through moral discourses such as “diligent teaching and arduous learning” and “dedication spirit”, structurally excessive work demands are legitimated. Moralised expressions obscure the irrationality of institutional arrangements, making it difficult for teachers to refuse or question them.

**Supplementary Table S4: Coding Structure for Theoretical Dimension 3**

Supplementary Table S4 presents the complete coding structure for Theoretical Dimension 3: Multi-dimensional Predicaments in Teachers' Work Status. This dimension comprises 5 Focused Categories, 30 Initial Codes, and a total of 138 citations. When the organization transfers the responsibility for adaptation to individual teachers through the various mechanisms revealed in Dimension 2, what teachers experience is a systemic predicament involving multiple dimensions, including time, role, professionalism, efficacy, and support.

Coding Structure for Focused Category 3.1

| **Initial Code** | **Frequency** | **Representative Data Source** | **Theoretical Significance** |
| --- | --- | --- | --- |
| 46.16-Hour Daily Work Schedule | 9 | TEA-01, SCH-03, Teacher Group Interviews | Extremization of Time Investment |
| 47.Daily Schedule from 5 AM to 10 PM | 7 | SCH-03, Teacher Group Interviews | Deprivation of Personal Life Time |
| 48.Only 200 Yuan Subsidy for 60 Extra Hours | 5 | TEA-07, SCH-05 | Symbolism of Compensation |
| 49. Income is Half of Spouse's but Time Commitment is Twice as Much | 4 | TEA-02, SCH-03 | Imbalance between Input and Reward |
| 50.Overall Annual Income of 160k–200k (RMB) | 6 | SCH-05, Teacher Group Interviews, PAR-01 | Absolute Income Level |
| 51.Income Gap Compared to Civil Servants | 5 | SCH-05, School Management Group Interviews | Sense of Relative Deprivation |
| 52.Absence of Weekend Off System | 4 | SCH-05, Teacher Group Interviews | Absence of the Right to Rest |

**Note:** The statement “income is half of spouse's, but time commitment is twice as much” precisely reveals the essence of resource depletion. The extreme working conditions, such as the 16-hour workday, the absence of weekends, and waking up at 5 am, are institutionalized as professional norms, while economic returns fall far short of the investment.

Coding Structure for Focused Category 3.2

| **Initial Code** | **Frequency** | **Representative Data Source** | **Theoretical Significance** |
| --- | --- | --- | --- |
| 53.Grade Director Cum Academic Affairs Director | 3 | SCH-05 | Typification of Role Superimposition |
| 54.Severe Shortage of Academic Affairs Staff | 3 | SCH-04 | Insufficient Organizational Support |
| 55.Administrative Work Accounts for Over Half | 4 | ADM-03, School Management Group Interviews | Excessive Administrative Burden |
| 56.Unwillingness to Serve as Administrative Cadres | 6 | ADM-03, School Management Group Interviews | Decline in Professional Attractiveness |
| 57.Class Teachers Required to Be on Duty Multiple Times (Morning, Noon, Evening) | 8 | SCH-03, Teacher Group Interviews | Time Fragmentation |

**Note:** When the organization refuses to implement structural adjustments, it can only maintain functionality by forcefully increasing individual burdens. The repeated emergence of the phrase “I am the only one left” reveals a systemic shortage of human resources.

Coding Structure for Focused Category 3.3

| **Initial Code** | **Frequency** | **Representative Data Source** | **Theoretical Significance** |
| --- | --- | --- | --- |
| 58.Pedagogical Judgement on Student Self-Study Time Being Ignored | 7 | TEA-04, Teacher Group Interviews | Suppression of Pedagogical Philosophy |
| 59.Marginalization of Chinese Language Subject | 5 | Teacher Group Interviews | Inequality of Subject Value |
| 60.Unreasonable Allocation of Teaching Time | 6 | Teacher Group Interviews | Dominance of Managerial Logic |
| 61.Subject Mismatch for Top Students | 4 | Teacher Group Interviews | Deviation from Educational Goals |
| 62.Restricted Space for Teachers' Professional Development | 5 | Teacher Group Interviews | Loss of Professional Autonomy |

**Note:** Managerial logic (time control, preference for mathematics) suppresses pedagogical professionalism. Teachers’ professional judgements (e.g., “students need self-study time”) are systematically ignored, leading to the erosion of professional identity.

Coding Structure for Focused Category 3.4

| **Initial Code** | **Frequency** | **Representative Data Source** | **Theoretical Significance** |
| --- | --- | --- | --- |
| 63.Only 2 Points Increase from Mock Exam to Gaokao | 4 | SCH-02, School Management Group Interviews | Quantitative Evidence of Efficacy |
| 64.Other Schools Achieved 10+ Points Increase | 3 | SCH-02 | Relative Performance Gap |
| 65.Student “Hollowing-out” Phenomenon | 5 | TEA-12，SCH-03 | Deterioration of Student Status |
| 66.Increase in Student Psychological Issues | 9 | SCH-03，Parent Group Interview | Negative Educational Outcomes |
| 67.Boarding Students Sent Home Due to Psychological Problems | 4 | SCH-03 | Increase in Severe Cases |

**Note:** The comparison between “only 2 points increase vs. 10 points increase” provides objective evidence of the decline in efficacy. More seriously, the generalization of student mental health issues reflects the deep-seated harms of the high-pressure control model. Code 66 received the highest frequency (9 citations) across Dimension 3.

Coding Structure for Focused Category 3.5

| **Initial Code** | **Frequency** | **Representative Data Source** | **Theoretical Significance** |
| --- | --- | --- | --- |
| 68.Young Teachers Only Read PPTs in Class | 4 | STU-05 | Manifestation of Insufficient Competence |
| 69.Students Clearly Perceive Teachers' Insufficient Competence | 3 | STU-05 | Perception at the Most Basic Level |
| 70.Difficulty for New Teachers to Quickly Stabilize in Teaching | 5 | School Management Group Interviews | Failure of the Cultivation System |
| 71.Generational Value Conflict | 6 | ADM-03 | Cultural Conflict |
| 72.Lack of Vitality among New Teachers | 7 | ADM-03, School Management Group Interviews | Weakening of Professional Identity |
| 73.Decline in Positive and Upward Organizational Atmosphere | 5 | ADM-03 | Deterioration of Organizational Culture |

**Note:** Students can directly perceive the teachers' lack of competence (“only reads the PPT”), which reveals the complete absence of a support system. The generational value conflict between new and old teachers (e.g., dedication-oriented vs. rights-oriented) further complicates the issue.

**Supplementary Table S5: Coding Saturation Process**

Code Accumulation Process and Theoretical Saturation

| **Data Collection Stage** | **Main Interviewees** | **Cumulative Codes** | **New Codes** | **New Code Rate** | **Saturation Judgement** |
| --- | --- | --- | --- | --- | --- |
| Batch 1 | Education Administration | 28 | 28 | 100% | Exploration Phase |
| Batch 2 | School Management | 54 | 26 | 48.1% | Rapid Accumulation |
| Batch 3 | Frontline Teachers | 68 | 14 | 20.6% | Approaching Saturation |
| Batch 4 | Student Representatives | 73 | 5 | 6.8% | Basic Saturation |
| Batch 5 | Parent Representatives | 73 | 3 | 3.9% | Confirmed Saturation |

**Note:** The new code rates for Batch 4 and Batch 5 decreased to 6.8% and 3.9% respectively, which is significantly lower than the 10% saturation criterion , indicating the achievement of theoretical saturation. The three theoretical dimensions showed clear emergence patterns across different interview stages: Dimension 1 primarily emerged from the first stage of interviews, Dimension 2 had significant findings in both stages, and Dimension 3 mainly emerged from the second stage of interviews.

**Supplementary Table S6: Inter-coder Reliability Test**

Two researchers independently coded 30% of randomly selected interview materials (10 interview texts) to calculate coding consistency. The results showed that Cohen's Kappa coefficient was 0.84 for the initial coding phase and 0.89 for the focused coding phase, both indicating a high degree of agreement (Landis & Koch, 1977).

| **Type of Disagreement** | **Example** | **Researcher A’s View** | **Researcher B’s View** | **Final Decision** |
| --- | --- | --- | --- | --- |
| Coding Granularity | Facial recognition vs Classroom monitoring | Coded Separately | Coded Merged | Retain detailed segmentation, merge during Focused Coding phase |
| Code Categorization | 80% of teachers’ values changed | Classified under “Teacher Attrition” | Classified under “Generational Conflict” | Adopt Researcher B's categorization |
| Theoretical Significance | 60 hours for 200 Yuan | Emphasize “Low Subsidy” | Emphasize “Control Mechanism” | Both interpretations are valid, listed in parallel in code description |

**Part 2: Representative Data Excerpts**

**Supplementary Note S1: Nine Key Data Passages**

This section presents 10 data passages with the highest theoretical value, demonstrating the extraction process from raw interview data to codes. Each passage retains the interviewee's original expression and conversational context, directly corresponding to the core theoretical findings of this study.

**Passage 1: Sanctification of Historical Achievements**

Interviewee: SCH-03 (School Management)

Supporting Focused Category: 1.1 Repeated Emphasis and Sanctification of Historical Achievements (Table S2)

Raw Interview Data:

*From the end of the last century to after the year 2000, in terms of Gaokao (National College Entrance Examination) results, School X was continuously at the peak, and this performance lasted for seventeen or eighteen years.*

*During that period, every week there were one to two batches of peer schools coming to observe and learn. The visiting principals greatly admired the teachers of School X. One sentence left a deep impression on me: “The work intensity of School X's teachers is comparable to the hell mode; in comparison, the teachers at our school are practically in heaven”.*

*At that time, class teachers were at school six and a half days a week, from half-past six in the morning until nine-thirty or ten o’clock at night every day. Teachers and students only had Sunday afternoon off. They only had a small fraction of time off during the winter and summer vacations as well. It was exactly this intense dedication that resulted in such excellent educational achievements!*

Coding Analysis:

This passage contains 4 Initial Codes: Code 1 (Historical narrative of extreme working hours, Freq. 8), Code 2 (Glorious memory of the golden period, Freq. 12), Code 4 (Frequent reception of visits from external schools, Freq. 5), and Code 6 (External evaluation of “teachers in hell”, Freq. 3). The key finding is the metaphor of the “hell mode”—the external principal described the extreme working state of School X teachers as “hell”, while their own school was “heaven”. This statement is not only an acknowledgment of the teachers’ dedication but also a re-construction of the extreme work model from a temporary historical expediency into an eternal truth for achieving success. The interviewee, in the narrative, establishes a direct causal link between “it was exactly this intense dedication” and “such excellent educational achievements”, reflecting the solidification of successful experience. Code 2 (Glory of the Golden Period), with a frequency of 12, is the most frequent code in Focused Category 1.1.

**Passage 2: The Typical Scenario of Decoupling Authority and Responsibility**

Interviewee: SCH-04 (School Management)

Supporting Focused Category: 2.2 Decoupling of Decision-making Authority and Executive Responsibility (Table S3)

Raw Interview Data:

*Last year, the Vice Director of the Academic Affairs Office was directly transferred to another place to serve as Vice Principal in August. The school did not know about it beforehand, and there was nothing we could do afterward. This sudden personnel change completely disrupted the normal teaching arrangements.*

*I was the former Vice Director of Academic Affairs. The Vice Director who worked with me was promoted to Vice Principal at another high school, and the Director was also promoted. Only I was left. Last year, I managed both Grade 11 and served as the Academic Affairs Director, which made the workload extremely heavy.*

*Many transfers in the school are decided directly by the Education Bureau. The school has very little autonomy in personnel arrangements. However, when a problem arises, our school is ultimately the one that has to bear the responsibility and figure out how to compensate for it.*

Coding Analysis:

This passage contains 4 Initial Codes: Code 30 (Sudden personnel transfer, Freq. 6), Code 31 (Problem of frequent teacher turnover, Freq. 8), Code 32 (Direct intervention by the Education Bureau, Freq. 5), and Code 33 (Absence of school autonomy, Freq. 4). The expression "Only I was left" precisely captures the individual predicament caused by the decoupling of authority and responsibility. Decision-making authority rests above (the Education Bureau decides personnel transfers), while executive responsibility lies below (the school bears the consequences of disrupted teaching arrangements). The adaptation costs are borne by the individual (the Academic Affairs Director must undertake multiple roles simultaneously). More critically, the interviewee’s statements—“The school did not know about it beforehand, and there was nothing we could do afterward” and “when a problem arises, our school is ultimately the one that has to bear the responsibility”—reveal the institutionalized feature of this decoupling: the school can neither control the changes nor escape the need to bear their consequences.

**Passage 3: Quantitative Evidence of Resource Depletion**

Interviewee: TEA-02 (Frontline Teacher), SCH-05 (School Management)

Supporting Focused Category: 3.1 Extremization of Working Hours and Disproportionate Returns (Table S4)

Raw Interview Data:

*TEA-02: My wife’s income is twice mine. My time spent at school is twice hers, and her income is twice mine. My wife works in a corporation. Primary school teachers in H City even earn more than our high school teachers, which is why some teachers are unwilling to stay. Our working hours are very long, we don't even have weekends off, but the income is low.*

*SCH-05: Our average income is about 200,000 RMB, including various subsidies. Teachers with senior professional titles might be slightly higher, but only around 220,000 or 230,000 RMB. Our income is indeed inferior to that of civil servants. For example, a civil servant at a deputy section-level would earn more than our senior-level teachers, and civil servants also receive a comprehensive performance bonus awarded at the end of the year.*

Coding Analysis:

This passage contains 7 Initial Codes: Code 46 (16-Hour Daily Work Schedule, Freq. 9), Code 47 (Daily Schedule from 5 AM to 10 PM, Freq. 7), Code 48 (Only 200 Yuan Subsidy for 60 Extra Hours, Freq. 5), Code 49 (Income is Half of Spouse's but Time Commitment is Twice as Much, Freq. 4), Code 50 (Overall Annual Income of 160k–200k, Freq. 6), Code 51 (Income Gap Compared to Civil Servants, Freq. 5), and Code 52 (Absence of Weekend Off System, Freq. 4). The "twice vs. twice" comparison is the most precise quantitative expression of the imbalance between input and reward in this study: the teacher's time investment is 2 times that of a corporate employee (16 hours vs. 8 hours), but the economic return is only 1/2, resulting in a 4-fold imbalance in the input-output ratio. This resource depletion is further reinforced through multiple comparisons: compared to the spouse (2x time, 1/2 income), compared to civil servants (senior-level teacher < deputy section-level civil servant), and compared to primary school teachers (high school teacher < primary school teacher), creating an all-encompassing sense of relative deprivation. Code 46 (16-Hour Work Schedule), with a frequency of 9, ranks among the highest frequency codes in this study, alongside Code 58 (Pedagogical Judgement Being Ignored, Freq. 7) and Code 66 (Student Psychological Issues, Freq. 9).

**Passage 4: Suppression of Professional Judgement and Decline in Efficacy**

Interviewee: TEA-04, TEA-05 (Frontline Teachers), SCH-02 (School Management)

Supporting Focused Category:3.3 Marginalization of Professional Judgement (Table S4), 3.4 Objective Decline in Teaching Efficacy (Table S4)

Raw Interview Data：

*TEA-04: The students who truly score well all possess very strong self-study abilities, but the school leadership has scheduled every minute of the students' time. They have classes every evening for the third period. Out of seven evenings, six evenings are spent in class, with only Saturday night off: two evenings for Chinese, two for Math, and two for English. Current students lack the construction of a knowledge system, the systematic organization of methods, and the cultivation of self-learning ability. They need time to do these things, but now the school leadership has arranged the students' time to be extremely tight.*

*TEA-05: Leaders and students actually agree that Chinese, Math, and English are all important subjects, but in reality, Chinese has always been a marginalized subject. Math is given one hour every day, which must be completed on a fixed schedule, and excellent students now are mainly focused on science subjects, so students generally slight the Chinese subject. If students' Chinese scores are poor, the teacher can't do anything about it—the time is controlled by Physics, Chemistry, and Math; where is the control for us?*

*SCH-02: According to the school's statistics, in the two months from the third-year mock exam to the Gaokao, the average score increase for School X students was only about two points. However, some peer schools were able to achieve an increase of over 10 points. For example, the increase for English was about 6 points. Other subjects generally increase by four points, while our school can only manage two points.*

Coding Analysis:

This passage spans two Focused Categories, containing 6 Initial Codes: Code 58 (Pedagogical judgement on student self-study time being ignored, Freq. 7), Code 59 (Marginalization of Chinese language subject, Freq. 5), Code 60 (Unreasonable allocation of teaching time, Freq. 6), Code 62 (Restricted space for teachers' professional development, Freq. 5), Code 63 (Only 2 points increase from mock exam to Gaokao, Freq. 4), and Code 64 (Other schools achieved 10+ points increase, Freq. 3). The systematic suppression of professional judgement is manifested at three levels: at the pedagogical philosophy level, the teachers' professional judgement that “students need self-study ability” is ignored, and the school fills up the students’ schedule (Code 58); at the subject status level, Chinese is marginalized while Math is overly reinforced (Codes 59-60), and TEA-05’s statement—“the time is controlled by Physics, Chemistry, and Math; where is the control for us?”—precisely captures the loss of professional autonomy; at the professional development level, teachers are downgraded from “professional educators” to “mere implementers” (Code 62). The data provided by SCH-02 shows that School X students only achieved a 2-point increase while other schools reached over 10 points (Codes 63-64), refuting the attribution that “teachers are not working hard enough”, and suggesting the problem lies in the systemic failure of organizational arrangements. This passage reveals how professional marginalization directly leads to a decline in efficacy, forming a vicious cycle of “erosion of professional identity → decline in efficacy → exacerbation of burnout”.

**Passage 5: The Impact of New Gaokao Reform and the Paradox of Control**

Interviewee:TEA-04 (Frontline Teacher), SCH-03 (School Management)

Supporting Focused Category:1.3 Direct Impact of New Gaokao Reform (Table S2), 1.5 Technological Reinforcement of Control Measures (Table S2)

Raw Interview Data:

*TEA-04: This is my eighth year of work. From the perspective of the Gaokao reform in Province Z, before the reform, our School X was still quite outstanding, perhaps having its own place. The Math paper for Liberal Arts students was relatively simple, and many students in Liberal Arts could score close to 150 points, with many scoring over 140. But now, after the reform, it's very difficult for Liberal Arts students to score well in the Math subject; it's hard to get high scores, and it’s difficult to produce top students in Liberal Arts, almost no chance at all.*

*Now we have adopted far more educational and pedagogical measures than before. Students used to have relatively free study time; we only had a weekly test and no special remedial classes, but the results were good back then. Now it's the same batch of teachers, the old teachers are still teaching, and their experience is rich. But we find that the quality of new student enrollment has severely declined; the level of Grade 10 students is truly getting worse year by year. We have adopted more measures. For example, it is now mandated that the one hour from 4:10 PM to 5:10 PM every afternoon is dedicated school-wide to Math training. The day's homework must be completed during this time and handed in immediately upon finishing.*

*SCH-03: The Gaokao reform has seriously undermined our status as a strong school in Liberal Arts. The implementation of the 7-out-of-3 model in Province Z's New Gaokao replaced the traditional separation of Liberal Arts and Science streams, and our school lost an advantage we had in Liberal Arts under the Old Gaokao system.*

Coding Analysis：

This passage spans two Focused Categories, containing 5 Initial Codes: Code 12 (Loss of status of Liberal Arts as an advantageous subject, Freq. 7), Code 13 (Impact brought by the same exam paper for Liberal Arts and Science, Freq. 6), Code 14 (Difficulties adapting to the 7-out-of-3 model, Freq. 5), Code 24 (Fine-grained control of student time, Freq. 9), and Code 25 (Fixed-time homework completion system, Freq. 6). TEA-04's statement reveals the undermining of the school’s core competitiveness due to the New Gaokao Reform: Liberal Arts Math went from “able to score 150 points” to “almost no chance at all” (Codes 12-13). The core of the environmental change lies in the fundamental alteration of evaluation standards, not marginal adjustments. Facing this impact, the school's response strategy is to “strengthen control” rather than “adaptive adjustment” : the key paradox revealed by Codes 24-25 is: “Students used to have relatively free study time... and the results were good back then. Now we have adopted more measures... but we find that the quality of new student enrollment has indeed severely declined”. This demonstrates the contradiction between strengthened control and declining efficacy. Code 24 (Fine-grained control of student time), with a frequency of 9, is the most frequent code in Focused Category 1.5.

**Passage 6: Individualization of Problem Attribution**

Interviewee：SCH-01 (School Management), TEA-08 (Frontline Teacher)

Supporting Focused Category：2.1 Tendency to Individualize Problem Explanation (Table S3)

Raw Interview Data:

SCH-01: The 2022 cohort was a group of students whose scores were relatively good in recent years; they were also the most diligent cohort. Current students are less proactive in their studies than before. Perhaps today's students are exposed to more things and have more ideas, unlike before when they focused solely on studying. We are also trying to find ways, such as establishing a Gaokao-oriented reward system that focuses on incentivizing high-performing teacher teams. We hope to use the incentive mechanism to motivate teachers to focus more on student learning.

TEA-08: We now don't have a decent teaching and research (T&R) team; when we conduct collective lesson preparation, everyone does their own thing, lacking in-depth professional dialogue. I think this is the key problem affecting teaching quality. But the school seems to be more focused on student issues, always saying that current students are not as good as before, and the quality of new student enrollment is declining. I admit that student quality does have an impact, but is there also a problem with our own T&R system and teacher cultivation system? These are rarely mentioned.

Coding Analysis：

This passage contains 4 Initial Codes: Code 26 (Attributing performance fluctuation to student "diligence level," Freq. 4), Code 27 (Emphasis on the decline in new student enrollment quality, Freq. 7), Code 28 (Criticism of student learning attitude, Freq. 5), and Code 29 (Neglecting defects in the teaching and research system, Freq. 4). A systematic difference exists in the perception of problem causes between management and frontline teachers. SCH-01 attributes performance differences to the student level: “The 2022 cohort... were also the most diligent cohort. Current students are less proactive in their studies than before” (Codes 26, 28). This attribution style systematically avoids structural problems at the organizational level. TEA-08’s reflection forms a sharp contrast: “We now don't have a decent teaching and research (T&R) team... I think this is the key problem affecting teaching quality” (Code 29). The key tension is: when facing performance decline, the management systemically individualizes the problem attribution (students are not diligent enough, new student quality is declining) while avoiding structural organizational problems (T&R system defects, insufficient teacher cultivation). Code 27 (Decline in new student enrollment quality) has a frequency of 7, indicating it is the most frequently used attribution discourse by the management.

**Passage 7: Moralization of Work Requirements**

Interviewee：TEA-07 (Frontline Teacher), SCH-04 (School Management)

Supporting Focused Category：2.4 Moralized Expression of Work Requirements (Table S3)

Raw Interview Data：

TEA-07: Class teachers must be at school for a very long time almost every day, but if they are sick one day and unable to be on duty, they will not receive the perfect attendance bonus. This system is actually quite strict; basically, as long as you are absent for one day, the monthly class teacher allowance will be affected. The school requires older teachers to be on late duty for 2 hours, and younger teachers for 2.5 hours. There is a subsidy for the excess portion: 200 yuan is subsidized for reaching 60 hours. We have to use facial recognition to clock in and out, and the system automatically records the time. If you come for 2 hours every day, 30 days a month is 60 hours, which adds up to only 200 yuan.

SCH-04: Class teachers are basically at school. If they arrive at school at 6:15 AM, they usually have to wake up at home around 5 AM. Third-year teachers arrive by 6 AM, and the class teacher usually needs to be there before 6 AM. During the morning reading session, they need to check on the students’ status, check for any discomfort, or anyone missing. They are on duty for about ten or twenty minutes, and then they can go eat breakfast. They need to check on the class before 12:10 PM, and again when the class bell rings at 1:20 PM. In the evening, they are required to be in class before 6 PM; for third-years, it is 5:50 PM. Our School X teachers are generally quite good; under such income circumstances, few go out to do tutoring. The tradition of our School X education back then was “teachers are diligent in teaching, students are diligent and arduous in learning”.

Coding Analysis：

This passage contains 5 Initial Codes: Code 41 (Economic benefits tied to attendance, Freq. 5), Code 42 (System requiring attendance even when sick, Freq. 4), Code 44 (Institutionalized demand for dedication spirit, Freq. 8), Code 45 (Requirement for extremely early arrival time, Freq. 6), and Code 48 (Only 200 Yuan subsidy for 60 extra hours, Freq. 5). The mechanism for legitimizing structurally excessive work demands through moral discourse unfolds at two levels. At the economic control level, TEA-07’s description of “if they are sick one day... they will not receive the perfect attendance bonus” (Code 42) and “200 yuan is subsidized for reaching 60 hours” (Code 48) reveals the rigid linkage of economic incentives and symbolic compensation—the hourly overtime subsidy is only 3.3 yuan, and this low, symbolic compensation reflects the organization's severe undervaluation of teachers' time. At the time control level, SCH-04’s description of “If they arrive at school at 6:15 AM, they usually have to wake up at home around 5 AM” (Code 45) institutionalizes the demand for extremely early arrival times. The key legitimization mechanism is reflected in SCH-04’s statement: “Our School X teachers are generally quite good; under such income circumstances, few go out to do tutoring. The tradition of our School X education back then was ‘teachers are diligent in teaching, students are diligent and arduous in learning’” (Code 44). By using moral discourse such as “diligent teaching, arduous learning” and “dedication spirit”, structurally excessive work demands are redefined as the moral obligation of teachers, making these extreme requirements difficult to question or reject. Code 44 (Institutionalized demand for dedication spirit), with a frequency of 8, is the most frequent code in Focused Category 2.4.

**Passage 8: Systemic Reflection and the “Waterloo-style” Turning Point**

Interviewee：ADM-03, ADM-05 (Education Administration Officials)、

Supporting Focused Category：2.4 Moralized Expression of Work Requirements (Table S3), 3.5 Absence of New Teacher Support System (Table S4)

Raw Interview Data：

ADM-03: I have a relatively strong feeling that the overall positive and upward atmosphere in the entire teacher cohort has declined significantly in recent years. Especially among the group of new teachers. We are actually powerless to motivate new teachers to dedicate themselves fully to the education cause. But this is the biggest problem—the teachers’ morale has dropped. We usually believe that becoming a good teacher requires both teaching attitude and teaching ability. But I personally believe that attitude is even more important than ability. Some teachers actually have decent ability, but they haven't fully committed themselves to the work. Within this system, the principal does not have many means to mobilize teachers; it relies more on the principal's personal charisma. The truly effective methods and means are indeed scarce.

ADM-05: After the implementation of performance-based pay in the compulsory education stage in 2009, we considered this a milestone turning point. Because there might be significant problems with the method of performance pay distribution, the teachers' dedication, which we describe ourselves as a “Waterloo-style” decline. Before, teachers were driven by a sense of professional calling. Although the salary was not high, everyone felt that teaching and nurturing people was a glorious thing. However, after the performance pay reform, all work was quantified—more work, more gain; less work, less gain. This was originally intended to be motivating, but the actual effects are threefold: First, it overly instrumentalized educational work, leading teachers to become calculative about how much money they get for which task. Second, it caused tension in internal school relations. Because performance pay is capped by a total amount, if you get more, I get less. What used to be a cooperative relationship has now become a competitive one. Third, truly excellent teachers feel that their efforts are not receiving due compensation. This is because performance distribution needs to consider balance, making it impossible to distribute solely based on contribution. The result is: “those who work well feel cheated, and those who work poorly don’t care”. So the biggest problem we face now is not money, it’s a people problem—the teachers’ vitality (Jing Qi Shen) is gone. This is harder to solve than money.

Coding Analysis:

This passage spans two Focused Categories, containing 5 Initial Codes: Code 44 (Institutionalized demand for dedication spirit, Freq. 8), Code 55 (Administrative work accounts for over half, Freq. 4), Code 72 (Lack of vitality/motivation among new teachers, Freq. 7), Code 73 (Decline in positive and upward organizational atmosphere, Freq. 5). ADM-03 offers a rare systemic reflection. He identifies three layers behind the problem of teacher “vitality (Jing Qi Shen)”: lack of motivational means (“the principal does not have many means to mobilize teachers... more on the principal’s personal charisma”), excessive workload (implicitly Code 55), and decline in professional attractiveness. ADM-05 reveals the systemic collapse from “professional calling-driven” to “institutional incentive failure”. The metaphor of “Waterloo” precisely captures the cliff-like shift—not a gradual decline, but a systemic collapse at a critical juncture. This reform marked a shift in teacher incentive mechanisms from intrinsic drivers (professional calling, moral identity) to extrinsic drivers (economic incentives, quantitative assessment). However, this shift resulted in a triple negative consequence: overly instrumentalizing educational work (teachers become calculative), causing internal school tension (cooperation turns into competition due to total compensation cap), and making truly excellent teachers feel uncompensated (the need for “balance” leads to “those who work well feel cheated, and those who work poorly don’t care”).。

**Passage 9: Perception of Teaching Quality from the Student Perspective**

Interviewee：Student Group Interview

Supporting Focused Category：2.2 Decoupling of Decision-making Authority and Executive Responsibility (Table S3), 3.5 Absence of New Teacher Support System (Table S4)

Raw Interview Data:

STU-02: Our class had two different teachers from Grade 10 to Grade 11, and then four more teachers were changed in the most recent year. Every time a teacher changes, we have to re-adapt—adapt to the teacher's teaching style, adapt to the teacher’s homework requirements, adapt to the teacher’s exam style. Some teachers speak too fast; we haven't even grasped the knowledge point, and they have already moved on to the next one. Some teachers speak too slowly; we feel like it’s a waste of time. Every teacher has a different style, but we have to constantly adapt.

STU-05: Young teachers are not very skilled in teaching; most of the time, they only read the PPT. Sometimes when we ask questions, the teacher cannot answer and says they need to go back and check the information. We can feel that some teachers are recent graduates and lack teaching experience. But there are also some teachers who are particularly good, explain clearly, and pay attention to each of our learning situations. We discuss privately which teachers teach well and which ones are not good. We listen very carefully to the good teachers’ classes, but the bad teachers’ classes we just... (Pause, did not continue)

Coding Analysis:

This passage contains 3 Initial Codes: Code 31 (Problem of frequent teacher turnover, Freq. 8), Code 68 (Young teachers only read PPTs in class, Freq. 4), and Code 69 (Students clearly perceive teachers’ insufficient competence, Freq. 3). Student STU-02’s description that “four more teachers were changed in the most recent year” reveals the sustained adaptation burden caused by frequent teacher turnover (Code 31). Every time a teacher changes, students must re-adapt to teaching styles, homework requirements, and exam styles, but they have no voice in the attribution or resolution of the problem. STU-05’s description that “Young teachers... only read the PPT, sometimes when we ask questions, the teacher cannot answer” (Codes 68-69), along with the unspoken content after the pause, demonstrates the students’ cautious attitude and protection of the teacher. As the direct recipients of the educational process, students are the ultimate bearers of organizational problems and the most sensitive observers. When students can clearly perceive that “the teacher only reads the PPT” and “the teacher cannot answer questions”, it suggests that the problem has broken through the organizational facade and is affecting the core function of education. This passage reveals the endpoint of the “pressure sinking” mechanism—organizational inertia, through the transfer of responsibility, leads to teacher predicament, ultimately harming the core goals of education: student learning and growth. This provides crucial support for the definition of “structural teacher burnout”.

**Part 3: Details of Research Methodology**

**Supplementary Method S1: Interview Protocol and Sampling Strategy**

**I. Participant Recruitment**

This study adopted a combined strategy of purposive sampling and snowball sampling to recruit 32 interview participants, covering five stakeholder groups: Education Administration Officials (n=5), School Management (n=7), Frontline Teachers (n=10), Student Representatives (n=5), and Parent Representatives (n=5). The recruitment process was divided into two phases. Phase I (August 15, 2025) involved obtaining approval for the study through official contact with the County Education Bureau and recruiting interviewees from the Education Administration and School Management. Phase II (August 19–20, 2025) involved recruiting Frontline Teachers, Student, and Parent Representatives through recommendations from the School Management and direct contact by the researchers. All participants voluntarily participated and signed informed consent forms.

**II. Semi-structured Interview Guide**

Core interview questions were tailored to different categories of respondents and organized around the following themes:

| Core Questions for Education Administration Officials | How do you evaluate the developmental changes of School X in recent years? |
| --- | --- |
| What challenges has the New Gaokao Reform brought to county-level high schools? |
| How do the Education Bureau and the school cooperate regarding personnel management? |
| What do you consider to be the main problems currently facing the teacher workforce development? |
| What impact has the performance-based pay reform had on the teachers' work status? |
| Core Questions for School Management | Please describe the historical development of School X and the challenges it currently faces. |
| What response measures has the school taken after the New Gaokao Reform? |
| What difficulties does the school face in terms of teacher workforce development? |
| How do you view the current status of teachers' work? |
| What is the extent of the school's autonomy in decision-making and personnel arrangements? |
| Core Questions for Frontline Teachers | Please describe your typical workday schedule. |
| What do you consider to be the main challenges facing teaching work currently? |
| How do the school's management systems and work requirements affect you? |
| How do you view the training and support for new teachers? |
| What are your expectations and concerns regarding your own professional development? |
| Core Questions for Student Representatives) | How do you evaluate the quality of teaching at the school? |
| What difficulties have you encountered in your recent studies? |
| How do you view the school's time scheduling and homework burden? |
| How do you evaluate the teaching of different teachers? |
| Core Questions for Parent Representatives | Why did you choose to enroll your child in School X? |
| How do you evaluate the quality of teaching at the school? |
| What do you believe are the main problems currently facing the school? |
| What are your expectations for the school? |

**III.Data Collection Process**

The interviews included both individual and group formats. Individual interviews lasted 45–90 minutes, and group interviews lasted 90–120 minutes. All interviews were recorded with participant consent and transcribed into 32 interview texts. To protect participant privacy, all interviewees were assigned anonymous codes: ADM (Education Administration Officials), SCH (School Management), TEA (Frontline Teachers), STU (Students), and PAR (Parents). All identifiable personal information (names, school names, geographical locations, etc.) in the transcribed texts was deleted or anonymized. Data collection followed the approval of the local Institutional Review Board/Ethics Committee, and all participants were informed about the research purpose, data usage, and the right to withdraw from the study.

**IV. Quality Assurance Measures**

In addition to the Inter-coder Reliability Test (Table S6) and Theoretical Saturation Verification (Table S5) presented in Part 1 of this Supplementary Material, the following quality assurance measures were also taken in this study:

Member Checking: The researchers compiled the preliminary coding structure and theoretical findings into a brief report (3–4 pages) and invited 5 key participants to provide feedback. The participants’ feedback generally supported the findings. Teacher TEA-04 strongly agreed with the concept of “pressure sinking”, stating that the concept “very accurately describes how we feel—the problem was not caused by us, but we are required to solve it”. Administration official ADM-01 stated that the study “reminds us not only to look at student problems, but also to reflect on organizational arrangements”. Parent PAR-02’s feedback was self-reflective: “Parents indeed have high expectations for the school, which might put too much pressure on them”. School management SCH-01 suggested adding the impact of the “disruption of the competition system” on the school, which the researchers adopted by adding relevant analysis to Focused Category 1.4. Notably, member checking also revealed different perspectives on the issues among various stakeholders. Managers focused more on external constraints (such as personnel transfers by the Education Bureau), while teachers focused more on specific difficulties in daily work. This difference in perspective itself validated the research finding—that systematic differences exist in problem attribution across different hierarchical levels.

Researcher Reflexivity：The research team has no employment or consulting relationship with the case school, ensuring the independence of the study. The researchers recognized that their background in educational research might bring an inclination toward a critical perspective, and thus maintained a reflexive stance throughout the study. Researchers managed potential bias through the following strategies: using member checking to ensure participants' endorsement of the findings; actively seeking counterexamples and alternative explanations (e.g., successful cases in similar schools); and maintaining reflexive memos throughout the study to record thoughts, confusions, and decisions during the analysis process.

Data Triangulation：This study adopted a multiple triangulation strategy to enhance the credibility of the findings. The sources of evidence triangulation included 32 in-depth interview transcripts, school records and policy documents, and quantitative data from 2020–2024 (e.g., teacher turnover rate, student performance). Method Triangulation combined qualitative coding analysis, quantitative trend analysis, and theoretical comparison with literature. Time Triangulation covered a historical review (the period of success from 2000–2020), the current status (transitional pressure from 2020–2025), and participants’ expectations and concerns about the future. Through cross-validation of different data sources, methods, and time dimensions, the study constructed a multidimensional understanding of the organizational inertia mechanism.

Searching for Negative Cases：The study actively sought evidence that might not support the theory, including cases of successful adaptation to the New Gaokao Reform (e.g., School S near School X), cases with high teacher satisfaction, and examples of successful organizational change. Analysis of negative cases prompted the researchers to refine the theory: not all high-performance schools experience organizational inertia; the key lies in how the organization attributes its success (whether to specific behavioral patterns or to systemic capacity building). Environmental shock is an activation condition rather than a sufficient condition for organizational inertia; external shocks only trigger a rigid response when the organization has solidified success into an unquestionable truth. These findings enhanced the boundary conditions and explanatory power of the theory.
